# Supplementary material
Source: publisher figshare collection journal article supplement (https://gsajournals.figshare.com/ndownloader/files/18715886)
Supplement: Supplementary file 1 [file 18715886]

**Table S3 Crosses of *pot* aberrant *D. melanogaster* to *D. simulans* yields no offspring.** We crossed *D. melanogaster pot* aberrant females to *D. simulans Lhr* males using the crossing methods described in the main text three separate times. This table shows the offspring count for female, balancer male, and pot- male offspring. No cross produced pot‑ offspring and only two *pot* balancer males resulted from all three crosses.

| **Table S3** | **Offspring #** | | |
| --- | --- | --- | --- |
| **Cross**  **(female x male)** | **females** | ***pot-* males** | ***pot* bal. males** |
| *pot* x *Lhr* -1 | 43 | 0 | 1 |
| *pot* x *Lhr* -2 | 49 | 0 | 1 |
| *pot* x *Lhr* -3 | 26 | 0 | 0 |
